# Supplementary material for: Smart microcapsules for direction-specific burst release of hydrophobic drugs
Source: Royal Society of Chemistry journal article supplement (doi:10.1039/c4ra09174d), 2014-09-18
Supplement: c4ra09174d4.pdf [file c4ra09174d4.pdf]

Supplementary Material (ESI) for RSC Advances  
This journal is © The Royal Society of Chemistry 2014

## ***Supplementary Information***

### **Smart microcapsules for direction-specific burst release of hydrophobic drugs**

Ying-Mei Liu,<sup>a</sup> Wen Wu,<sup>a</sup> Xiao-Jie Ju,<sup>a</sup> Wei Wang,<sup>a</sup> Rui Xie,<sup>a</sup> Chuan-Lin Mou,<sup>a</sup>

Wei-Chao Zheng,<sup>a</sup> Zhuang Liu<sup>a</sup> and Liang-Yin Chu<sup>\*ab</sup>

<sup>a</sup> *School of Chemical Engineering, Sichuan University, Chengdu, Sichuan 610065, P. R. China. Fax & Tel: +86 28 8546 0682; E-mail: chuly@scu.edu.cn.*

<sup>b</sup> *State Key Laboratory of Polymer Materials Engineering, Sichuan University, Chengdu, Sichuan 610065, P. R. China.*

## Supplementary Figures

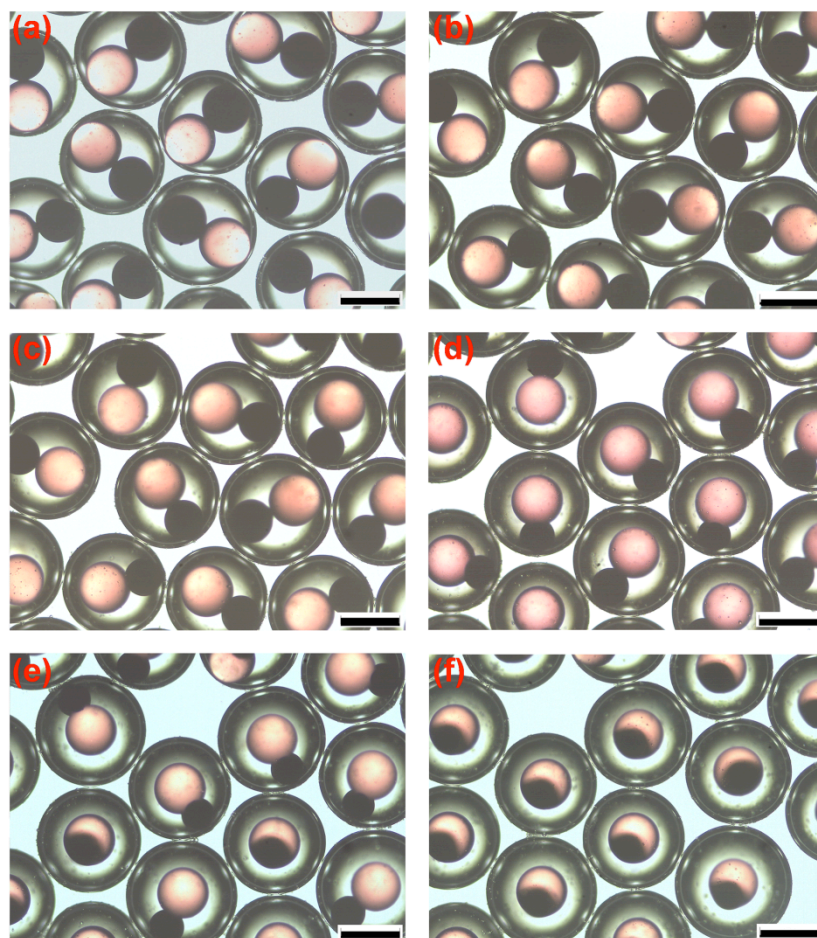

**Fig. S1** Optical micrographs of the (O1+O2)/W/O quadruple-component double emulsions at 11.23 min (a), 13.7 min (b), 15.57 min (c), 21.75 min (d), 25.57 min (e), and 33.58 min (f) after formation. Scale bars are 200  $\mu\text{m}$ .

## **Supplementary Movies**

**Movie S1.** Magnetic-guided movement of the magnetic PNIPAM core-shell microcapsules.

**Movie S2.** Thermal-triggered release of hydrophobic drugs from magnetic PNIPAM core-shell microcapsules by increasing temperature from 20 °C to 60 °C.

**Movie S3.** Direction-specific burst release of hydrophobic drugs from magnetic PNIPAM core-shell microcapsules.
